# Supplementary material for: Genetic Isolation between the Western and Eastern Pacific Populations of Pronghorn Spiny Lobster Panulirus penicillatus
Source: PubMed Central journal article supplement (PMC3240654; doi:10.1371/journal.pone.0029280), 2011-12-15
Supplement: pone.0029280.s001.pdf [file pone.0029280.s001.pdf]

**Table S1.** Polymorphic nucleotide sites in 1,103 bp partial mitochondrial DNA COI gene of 76 haplotypes detected in 91 individuals of *Panulirus penicillatus*.

| Types | Nucleotide position                                                                                                                                                  |  |
|-------|----------------------------------------------------------------------------------------------------------------------------------------------------------------------|--|
|       | 111111111111222222222222222233333333333344444444444455555555666666666677777777                                                                                       |  |
|       | 12345567889990123445778990000113445556691222336901234445890334779014445589901456881087345703258706109869557136925928148069406725857324069284909826007147060681662125 |  |
| 1     | AAATTACGATAGCGAGTGCTTGTACACAAAGAAACCTCAAGTGTGATTGAAACCTAGGCCAAGAATATTTAGCGATATAAACAG                                                                                 |  |
| 2     | .....T.....                                                                                                                                                          |  |
| 3     | .....C.....                                                                                                                                                          |  |
| 4     | .....C.....                                                                                                                                                          |  |
| 5     | .....C.....G.....                                                                                                                                                    |  |
| 6     | .....C.....G.....                                                                                                                                                    |  |
| 7     | .....C.....G.....                                                                                                                                                    |  |
| 8     | .....C.....G.....G.....                                                                                                                                              |  |
| 9     | .....C.....G.....G.....                                                                                                                                              |  |
| 10    | .....C.....G.....G.....                                                                                                                                              |  |
| 11    | .....C.....G.....G.....                                                                                                                                              |  |
| 12    | .....C.....G.....G.....G.....                                                                                                                                        |  |
| 13    | .....C.....G.....C.....G.....                                                                                                                                        |  |
| 14    | .....C.....G.....G.....                                                                                                                                              |  |
| 15    | .....C.....G.....G.....G.....                                                                                                                                        |  |
| 16    | .....C.....G.....G.....G.....                                                                                                                                        |  |
| 17    | .....C.....G.....T.....G.....                                                                                                                                        |  |
| 18    | .....C.....T.....G.....G.....                                                                                                                                        |  |
| 19    | .....C.....G.....G.....G.....                                                                                                                                        |  |
| 20    | .....C.....G.....G.....C.....G.....                                                                                                                                  |  |
| 21    | .....C.....A.....G.....G.....                                                                                                                                        |  |
| 22    | .....C.....A.....T.....G.....                                                                                                                                        |  |
| 23    | .....A.....C.....G.....                                                                                                                                              |  |
| 24    | .....G.....C.....                                                                                                                                                    |  |
| 25    | .....T.....G.....C.....                                                                                                                                              |  |
| 26    | .....T.....A.....                                                                                                                                                    |  |
| 27    | .....G.....G.....GC.....A.....                                                                                                                                       |  |
| 28    | .....C.....C.....                                                                                                                                                    |  |
| 29    | .....C.....C.....                                                                                                                                                    |  |
| 30    | .....C.....C.....A.....                                                                                                                                              |  |
| 31    | .....C.....G.....C.....                                                                                                                                              |  |
| 32    | .....C.....C.....                                                                                                                                                    |  |
| 33    | .....C.....C.....G.....G.....                                                                                                                                        |  |
| 34    | .....C.....C.....G.....GG.....                                                                                                                                       |  |
| 35    | .....C.....C.....GA.....G.....                                                                                                                                       |  |
| 36    | .....A.....G.....G.....C.....G.....C.....G.....                                                                                                                      |  |
| 37    | .....G.....G.....C.....G.....C.....G.....                                                                                                                            |  |
| 38    | .....A.....A.....C.....G.....                                                                                                                                        |  |
| 39    | .....A.....C.....C.....                                                                                                                                              |  |
| 40    | .....C.....C.....A.....A.....                                                                                                                                        |  |
| 41    | .....G.....G.....C.....AG.....G.....                                                                                                                                 |  |
| 42    | .....T.....C.....G.....G.....G.....                                                                                                                                  |  |
| 43    | .....A.....C.....G.....                                                                                                                                              |  |
| 44    | .....A.....C.....G.....C.....A.....G.....                                                                                                                            |  |
| 45    | .G.C.....TA.C.....C.G.T.C..A.A.C.....TA.C.....A.G.G...A.A                                                                                                            |  |
| 46    | .GG.C.....TA.C.....C.G.T.C..A.A.C.....TA.A.....A.G.G...GA.A                                                                                                          |  |
| 47    | .GG.C.....TA.C.....C.G.T.C..A.A.C.....TA.C.....A.G.G...GA.A                                                                                                          |  |
| 48    | .GG.C.....TA.C.....C.G.T.C..A.A.C.....TA.C.....A.G.G...GA.A                                                                                                          |  |
| 49    | .GG.C.....TA.C.....C.G.T.C..A.A.C.....TA.C.....A.GCG...GA.A                                                                                                          |  |
| 50    | .GG.C.....TA.C.....C.G.T.C..A.A.C.....TA.C.....A.G.G...GA.A                                                                                                          |  |
| 51    | .GG.C.....TA.C.....C.G.T.C..A.A.C.....TA.C.....A.G.G...A.A                                                                                                           |  |
| 52    | .GG.C.....TA.C.....C.G.T.C..A.A.C.....TA.GC.....A.G.G...GA.A                                                                                                         |  |
| 53    | .GG.C.....TA.C.....C.G.T.C..A.A.C.....T.TA.C.....A.G.G...GA.A                                                                                                        |  |
| 54    | .GG.C.....TA.C.....C.G.T.C..AC.A.C.....TA.C.....A.G.G...GA.A                                                                                                         |  |
| 55    | .GG.C.....TA.C.....C.G.TTC..A.A.C.....TA.C.....A.G.G...GA.A                                                                                                          |  |
| 56    | .GG.C.....TA.C.....G.G.T.C..A.A.C.....TA.GC.....A.G.G...GA.A                                                                                                         |  |
| 57    | .GG.C.....TA.C.....TG.G.T.C..A.A.C.....TA.C.....A.G.G...GA.A                                                                                                         |  |
| 58    | .GG.C.....TA.AC.....C.G.T.C..A.A.C.....TA.C.....A.G.G...GA.A                                                                                                         |  |
| 59    | .GG.C.....TA.AC.....C.G.T.C..A.A.C.....TA.C.....A.G.G...GA.A                                                                                                         |  |
| 60    | .GG.C.....TA.AC.....C.G.T.C..A.A.C.....TA.C.....A.G...GA.A                                                                                                           |  |
| 61    | .GG.C.....TA.AC.....C.G.T.C..A.A.C.....TA.C.....A.G.G...GA.A                                                                                                         |  |
| 62    | .GG.C.....TA.AC.....C.G.T.C..A.A.C.....GTA.C.....A.G.G...GA.A                                                                                                        |  |
| 63    | .GG.C.....TA.AC.....C.G.T.C..A.AA.C.....T.TA.C.....A.G.G...GA.A                                                                                                      |  |
| 64    | .GG.C.....TA.AC.....C.G.T.C..AC.A.C.....TA.C.....A.G...GA.A                                                                                                          |  |
| 65    | .GG.C.....TA.AC.....C.G.GT.C..A.AA.C.....T.TA.C.....A.G.G...GA.A                                                                                                     |  |
| 66    | .GG.C.....TA.AC.....T.C.G.T.C..A.A.CC.....TA.C.....A.G.G...GA.A                                                                                                      |  |
| 67    | .GG.C.....C.TA.C.....AGTG.G.T.C..A.A.C.....TA.C.....A.G.G...GA.A                                                                                                     |  |
| 68    | .GG.C.A.....TA.CA.....C.G.T.C..A.A.C.....TA.C.....A.G.G...GA.A                                                                                                       |  |
| 69    | .GG.C.T.....TA.C.....C.G.T.C..A.A.C.....T.TA.C.....A.G.G...GA.A                                                                                                      |  |
| 70    | .GG.CG.....T.C.....CAG.T.C..A.AA.C.....TA.C.....A.G.G...GA.A                                                                                                         |  |
| 71    | .GG.CG.....TA.C.....C.G.T.C..A.A.C.....TA.C.....A.G.G...GA.A                                                                                                         |  |
| 72    | .GG.CG.....TA.C.....CAG.T.C..A.A.C.....TA.C.....A.G.G...GA.A                                                                                                         |  |
| 73    | .GG.CG.....TAG.C.....CAG.T.C..A.A.C.....TA.C.....A.G.G...GA.A                                                                                                        |  |
| 74    | .GG.CG.....C.TA.C.....C.G.T.C..A.A.C.....TA.C.G...A.G.GC.GA.A                                                                                                        |  |
| 75    | .GGCC.....TA.C.....C.G.T.C..AC.A.C.....TA.C.....A.G.G...GA.A                                                                                                         |  |
| 76    | GGG.C.....TA.C.....C.G.T.C..A.A.C.....TA.GC.....A.G.G...GA.A                                                                                                         |  |
